# Supplementary material for: Intrinsically stretchable fully π-conjugated polymers with inter-aggregate capillary interaction for deep-blue flexible inkjet-printed light-emitting diodes
Source: PubMed Central journal article supplement — Nat Commun. 2025 Jan 2;16:330. doi: 10.1038/s41467-024-55494-2 (PMC11696129; doi:10.1038/s41467-024-55494-2), 2025-01-02
Supplement: 41467_2024_55494_MOESM1_ESM.pdf [file 41467_2024_55494_MOESM1_ESM.pdf]

# Supplementary Information

## Intrinsically Stretchable Fully $\pi$ -Conjugated Polymers with Inter-aggregate Capillary Interaction for Deep-blue Flexible Inkjet-printed Light-emitting Diodes

Mingjian Ni,<sup>1,2</sup> Zhiqiang Zhuo,<sup>1</sup> Bin Liu,<sup>3</sup> Xu Han,<sup>2</sup> Jing Yang,<sup>1</sup> Lili Sun,<sup>4</sup> Yuekuan Yang,<sup>2</sup> Jiangli Cai,<sup>3</sup> Xiang An,<sup>1</sup> Lubing Bai,<sup>1</sup> Man Xu,<sup>5</sup> Jinyi Lin<sup>1,6\*</sup>, Quanyou Feng,<sup>5</sup> Guohua Xie,<sup>2</sup> Yutong Wu,<sup>1</sup> and Wei Huang<sup>1,2,3,4,5\*</sup>

<sup>1</sup>Key Laboratory of Flexible Electronics (KLOFE) & Institute of Advanced Materials (IAM), Nanjing Tech University (NanjingTech), 30 South Puzhu Road, Nanjing 211816, China.

<sup>2</sup>The Institute of Flexible Electronics (IFE, Future Technologies), Xiamen University, 422 Siming South Road, Xiamen 361005, China.

<sup>3</sup>Henan Industrial Science & Technology Institute for Flexible Electronics, Henan University, 379 North Section of Mingli Road, Zhengzhou 450046, China.

<sup>4</sup>School of Flexible Electronics (SoFE) & State Key Laboratory of Optoelectronic Materials and Technologies, Sun Yat-sen University, 66 Gongchang Road, Shenzhen 518107, China.

<sup>5</sup>State Key Laboratory of Organic Electronics and Information Displays & Institute of Advanced Materials (IAM), Nanjing University of Posts & Telecommunications, 9 Wenyuan Road, Nanjing 210023, China.

<sup>6</sup>Institute of Quantum and Sustainable Technology (IQST), School of Chemistry and Chemical Engineering, Jiangsu University, Zhenjiang 212013, China.

\*Correspondence: iamjylin@njtech.edu.cn (J.Y. Lin); iamdirector@fudan.edu.cn (W. Huang).

26 **Synthesis:**

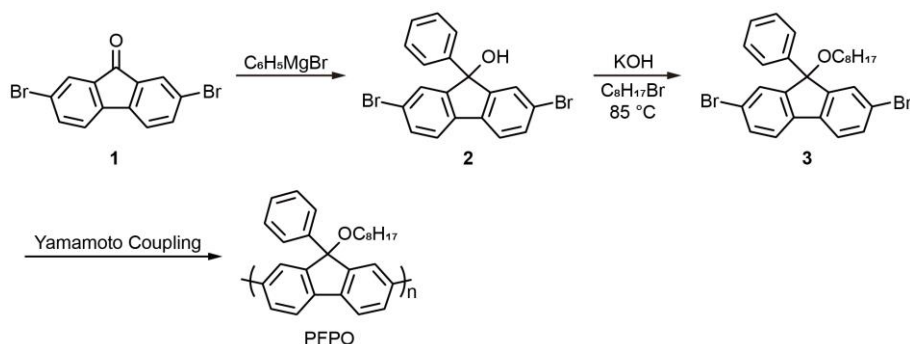

27

28 Supplementary Fig. 1. Synthetic route of PFPO.

29 **2,7-dibromo-9-phenyl-9H-fluoren-9-ol (2):** In a nitrogen atmosphere, compound 1 (0.47 g, 1  
 30 mmol) was solved in THF (40 mL). After adding the THF solution of phenyl magnesium bromide  
 31 (1 mol L<sup>-1</sup>, 1.6 mL), the mixture was stirred for 48 hours at 85°C. Then the reaction was quenched  
 32 by NH<sub>4</sub>Cl aqueous solution and the mixture was extracted with dichloromethane. The extracted  
 33 organic solution was dried with Na<sub>2</sub>SO<sub>4</sub>, and solvent was evaporated in vacuum. Compound 2  
 34 (yield: 0.35g, 85%) was obtained from chromatography using an eluent of petroleum  
 35 ether/dichloromethane (2:1).

36 <sup>1</sup>H NMR (400 MHz, Chloroform-*d*) δ 7.50 (d, *J* = 1.1 Hz, 4H), 7.43 (t, *J* = 1.1 Hz, 2H), 7.36 –  
 37 7.33 (m, 2H), 7.32 – 7.27 (m, 3H), 2.54 (s, 1H).

38 <sup>13</sup>C NMR (101 MHz, CHLOROFORM-*D*) δ 152.12, 141.67, 137.61, 132.57, 128.63, 128.41,  
 77

78 **2,7-dibromo-9-(octyloxy)-9-phenyl-9H-fluorene (3):** At room temperature, 2 (0.42 g, 1 mmol)  
 79 and KOH (0.10 g, 1.78 mmol) were solved in THF (40 mL). After adding 1-bromooctane (0.30 g,  
 80 1.55 mmol), the mixture was stirred for 24 hours at 85°C. Then the mixture was separated by  
 81 suction filtration using Buchner funnel. Compound 3 (yield: 0.50g, 94%) was obtained from  
 82 chromatography using an eluent of petroleum ether/dichloromethane (6:1).

83 <sup>1</sup>H NMR (400 MHz, Chloroform-*d*) δ 7.53 – 7.48 (m, 4H), 7.38 – 7.36 (m, 2H), 7.28 (td, *J* = 5.8,  
 84 2.7 Hz, 3H), 7.24 (td, *J* = 4.3, 1.1 Hz, 2H), 2.97 (t, *J* = 6.3 Hz, 2H), 1.55 – 1.49 (m, 2H), 1.34 –  
 85 1.20 (m, 10H), 0.90 – 0.86 (m, 3H).

86 <sup>13</sup>C NMR (101 MHz, CHLOROFORM-*D*) δ 149.69, 142.41, 138.66, 132.34, 128.66, 128.43,  
 87 127.62, 125.56, 122.50, 121.45, 88.17, 63.59, 31.95, 30.02, 29.41, 29.37, 26.14, 22.78, 14.23.

88 **Poly(9-(octyloxy)-9-phenyl-9H-fluorene) (PFPO):** Compound **3** (0.53 g, 1.01 mmol) was added  
 89 to an appropriate DMF (10 mL) and toluene (10 mL) solution containing Ni(COD)<sub>2</sub> (0.33 g, 1.20  
 90 mmol) 1,5-cyclooctadiene (0.15 mL, 1.20 mmol), and bpy (0.19 g, 1.23 mmol) in a Schlenk tube  
 91 under argon. The reaction mixture was stirred for 36 h at 90°C to obtain a dark blue solution. The  
 92 bromobenzene (0.5 mL) was added to solution for terminating reaction. The precipitate was  
 93 separated by filtration. The solution should further purification to be subjected to alumina (Al<sub>2</sub>O<sub>3</sub>)  
 94 column chromatography eluting with DCM to afford PFPO (yield: 0.28g, 75%) as an off-white  
 95 powder.

96 GPC:  $M_n=7.52 \times 10^4$ ,  $M_w=13.01 \times 10^4$ , PDI=1.73. <sup>1</sup>H NMR (400 MHz, Chloroform-*d*)  $\delta$  7.70 (s, 4H),  
 97 7.50 (s, 2H), 7.39 (s, 3H), 7.24 (s, 2H), 3.08 (s, 2H), 1.35 (s, 2H), 1.22 (s, 10H), 0.85 (s, 3H).

98

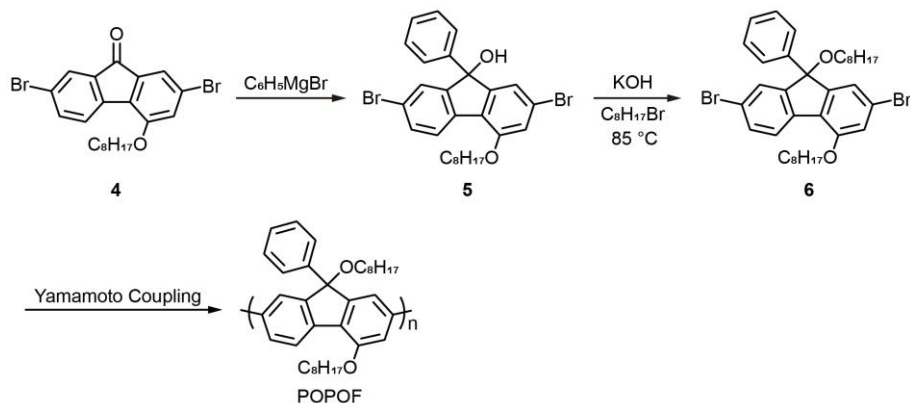

99

100 Supplementary Fig. 2. Synthetic route of POPOF.

101 **2,7-dibromo-4-(octyloxy)-9-phenyl-9H-fluoren-9-ol (5):** The **4** was synthesized according to our  
 102 previous report.<sup>1</sup> In a nitrogen atmosphere, compound **4** (0.47 g, 1 mmol) was solved in THF (40  
 103 mL). After adding the THF solution of phenyl magnesium bromide (1 mol L<sup>-1</sup>, 1.6 mL), the  
 104 mixture was stirred for 48 hours at 85°C. Then the reaction was quenched by NH<sub>4</sub>Cl aqueous  
 105 solution and the mixture was extracted with dichloromethane. Compound **5** (yield: 0.46g, 85%)  
 106 was obtained from chromatography using an eluent of petroleum ether/dichloromethane (2:1).

107 <sup>1</sup>H NMR (400 MHz, Chloroform-*d*)  $\delta$  7.82 (d,  $J = 8.1$  Hz, 1H), 7.47 (dd,  $J = 8.2, 1.9$  Hz, 1H), 7.39  
 108 (d,  $J = 1.8$  Hz, 1H), 7.36 – 7.32 (m, 2H), 7.32 – 7.27 (m, 3H), 7.02 (dd,  $J = 10.3, 1.4$  Hz, 2H), 4.12  
 109 (t,  $J = 6.5$  Hz, 2H), 2.44 (s, 1H), 1.98 – 1.91 (m, 2H), 1.60 (s, 1H), 1.53 (d,  $J = 7.4$  Hz, 1H), 1.43 –  
 110 1.30 (m, 8H), 0.93 – 0.88 (m, 3H).

111 <sup>13</sup>C NMR (101 MHz, CHLOROFORM-*D*)  $\delta$  155.44, 153.16, 151.55, 141.77, 137.12, 132.43,

200

240

241 **2,7-dibromo-4,9-bis(octyloxy)-9-phenyl-9H-fluorene (6):** Compound **5** (0.55 g, 1.01 mmol) and  
242 KOH (0.10 g, 1.78 mmol) were solved in THF (40 mL) at room temperature. After adding  
243 1-bromooctane (0.30 g, 1.55 mmol), the mixture was stirred for 24 hours at 85°C. Then the  
244 mixture was separated by suction filtration using Buchner funnel. Compound **6** (yield: 0.64g, 98%)  
245 was obtained from chromatography using an eluent of petroleum ether/dichloromethane (6:1).

246 <sup>1</sup>H NMR (400 MHz, Chloroform-*d*) δ 7.83 (d, *J* = 8.2 Hz, 1H), 7.47 (dd, *J* = 8.1, 1.9 Hz, 1H), 7.33  
247 (d, *J* = 1.7 Hz, 1H), 7.29 (qd, *J* = 5.0, 4.5, 1.7 Hz, 2H), 7.26 – 7.20 (m, 3H), 6.99 (dd, *J* = 12.4, 1.4  
248 Hz, 2H), 4.12 (t, *J* = 6.5 Hz, 2H), 2.98 (t, *J* = 6.3 Hz, 2H), 1.95 (p, *J* = 6.6 Hz, 2H), 1.55 – 1.50 (m,  
249 2H), 1.46 – 1.29 (m, 12H), 1.23 (d, *J* = 15.8 Hz, 8H), 0.92 – 0.86 (m, 6H).

250 <sup>13</sup>C NMR (101 MHz, CHLOROFORM-*D*) δ 155.42, 150.82, 149.11, 142.56, 138.21, 132.20,

251

253 **Poly(4,9-bis(octyloxy)-9-phenyl-9H-fluorene) (POPOF):** Compound **6** (0.66 g, 1.00 mmol) was  
254 added to an appropriate DMF (10 mL) and toluene (10 mL) solution containing Ni(COD)<sub>2</sub> (0.33 g,  
255 1.20 mmol) 1,5-cyclooctadiene (0.15 mL, 1.20 mmol), and bpy (0.19 g, 1.23 mmol) in a Schlenk  
256 tube under argon. The reaction mixture was stirred for 36 h at 90°C to obtain a dark blue solution.  
257 The bromobenzene (0.5 mL) was added to solution for terminating reaction. The precipitate was  
258 separated by filtration. The solution should further purification to be subjected to alumina (Al<sub>2</sub>O<sub>3</sub>)  
259 column chromatography eluting with DCM to afford POPOF (0.40g, 80%) as a yellow powder.

260 GPC:  $M_n=3.64 \times 10^4$ ,  $M_w=6.98 \times 10^4$ , PDI=1.92. <sup>1</sup>H NMR (400 MHz, Chloroform-*d*) δ 8.04 (s, 1H),  
261 7.60 (s, 1H), 7.42 (s, 4H), 7.21 (s, 3H), 7.06 (s, 1H), 4.20 (s, 2H), 3.08 (s, 2H), 1.98 (s, 2H), 1.62  
262 (s, 2H), 1.37 (s, 10H), 1.23 (s, 10H), 0.92 (s, 6H). In addition, PODPF was synthesized based on  
263 our previous report.<sup>2</sup>

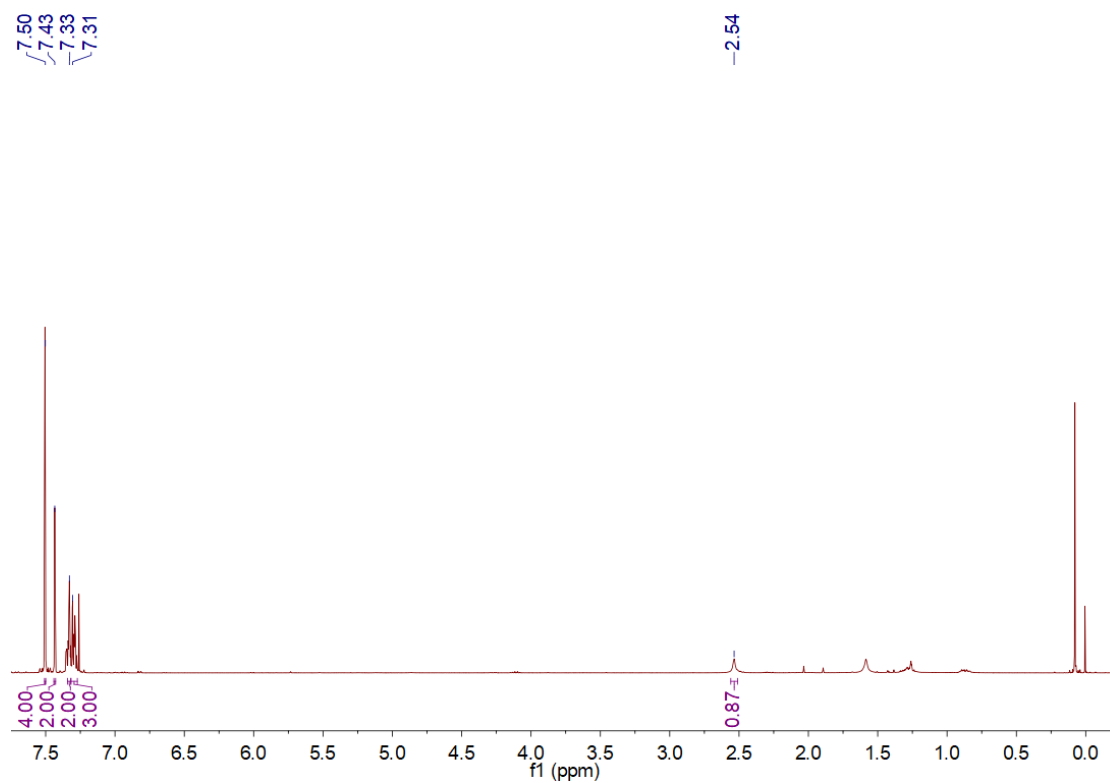

264

265 Supplementary Fig. 3.  $^1\text{H}$  NMR spectrum of **2** in  $\text{CDCl}_3$ .

266

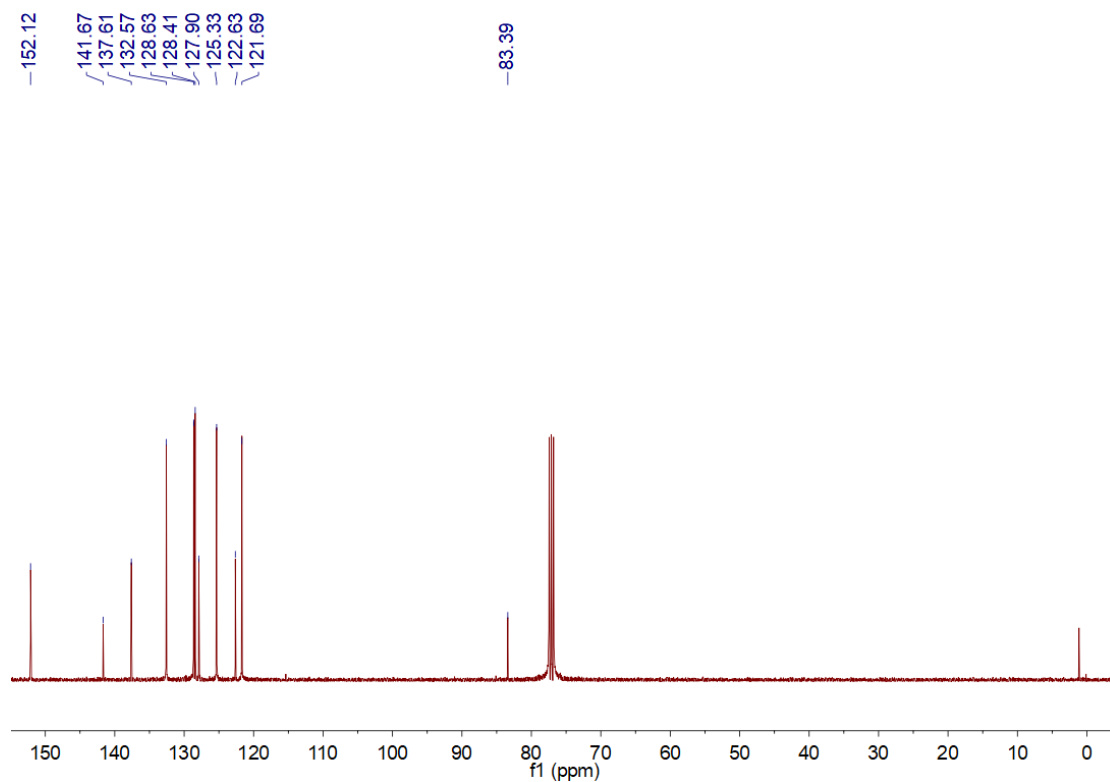

267

268 Supplementary Fig. 4.  $^{13}\text{C}$  NMR spectrum of **2** in  $\text{CDCl}_3$ .

269

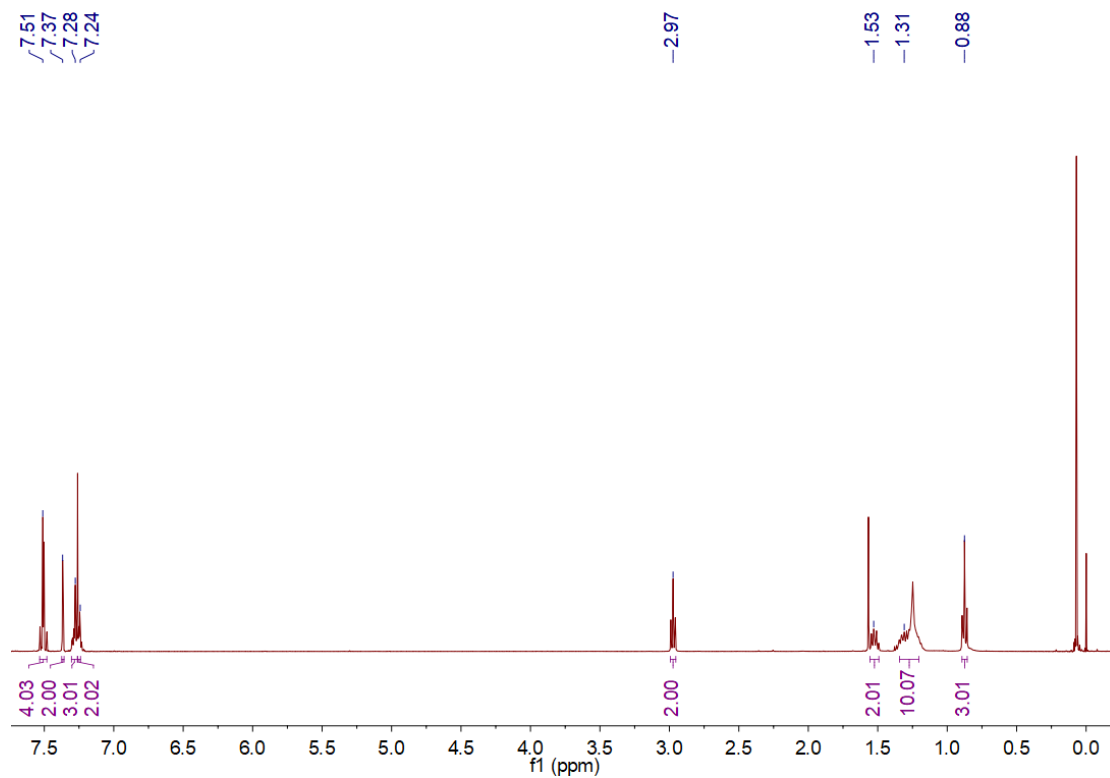

270

271 Supplementary Fig. 5.  $^1\text{H}$  NMR spectrum of **3** in  $\text{CDCl}_3$ .

272

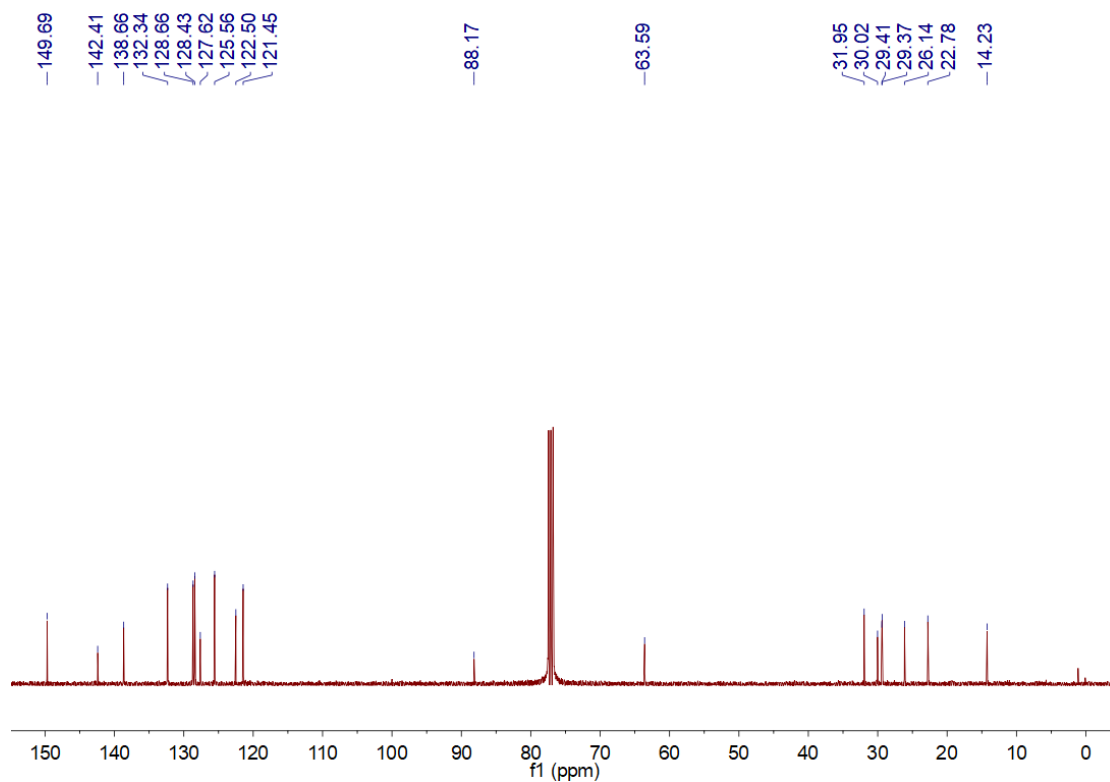

273

274 Supplementary Fig. 6.  $^{13}\text{C}$  NMR spectrum of **3** in  $\text{CDCl}_3$ .

275

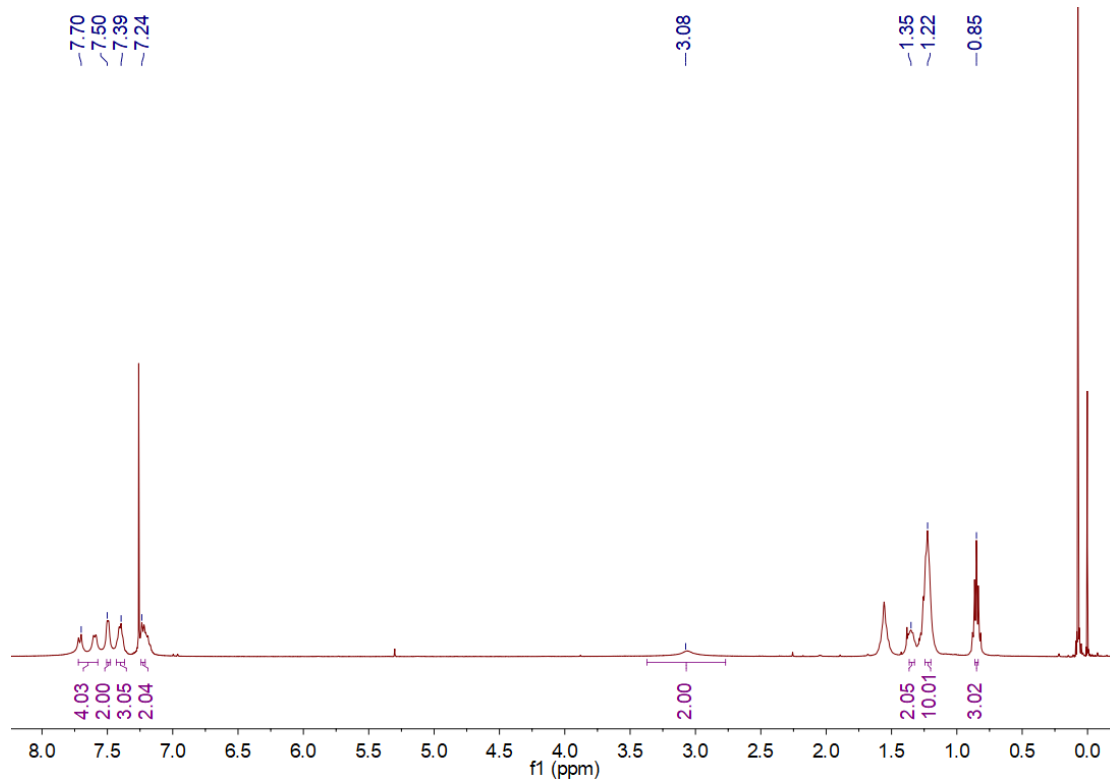

276

277 Supplementary Fig. 7.  $^1\text{H}$  NMR spectrum of PFPO in  $\text{CDCl}_3$ .

278

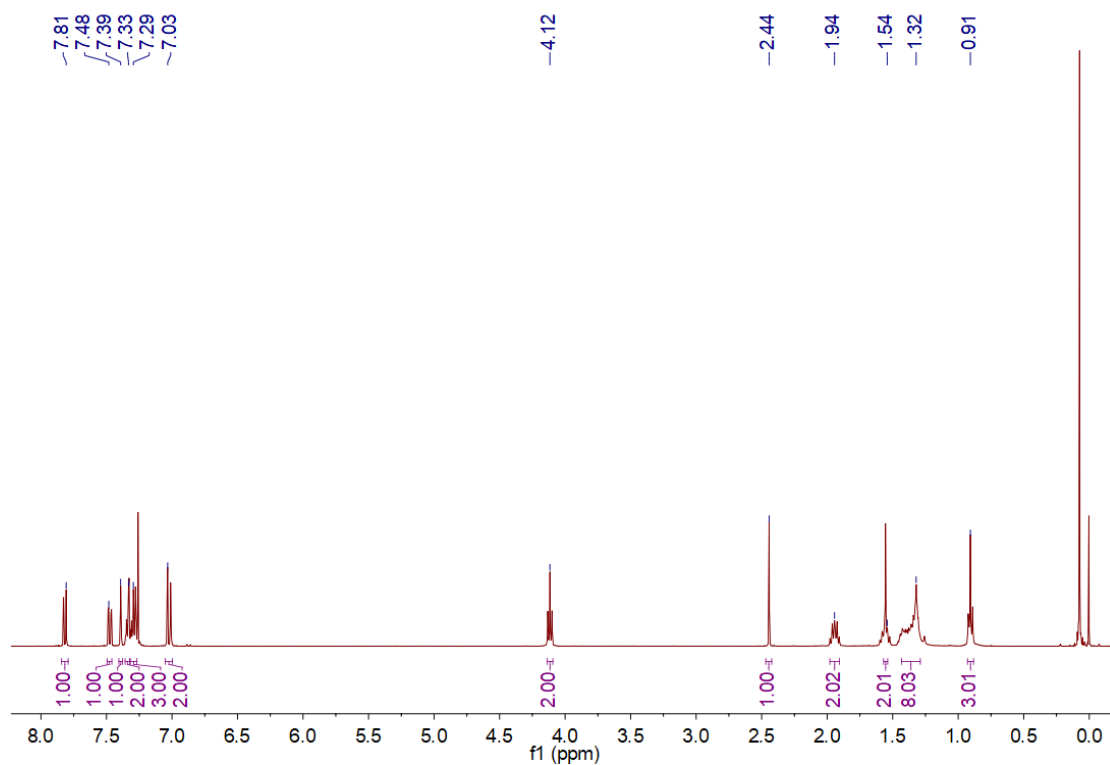

279

280 Supplementary Fig. 8.  $^1\text{H}$  NMR spectrum of **5** in  $\text{CDCl}_3$ .

281

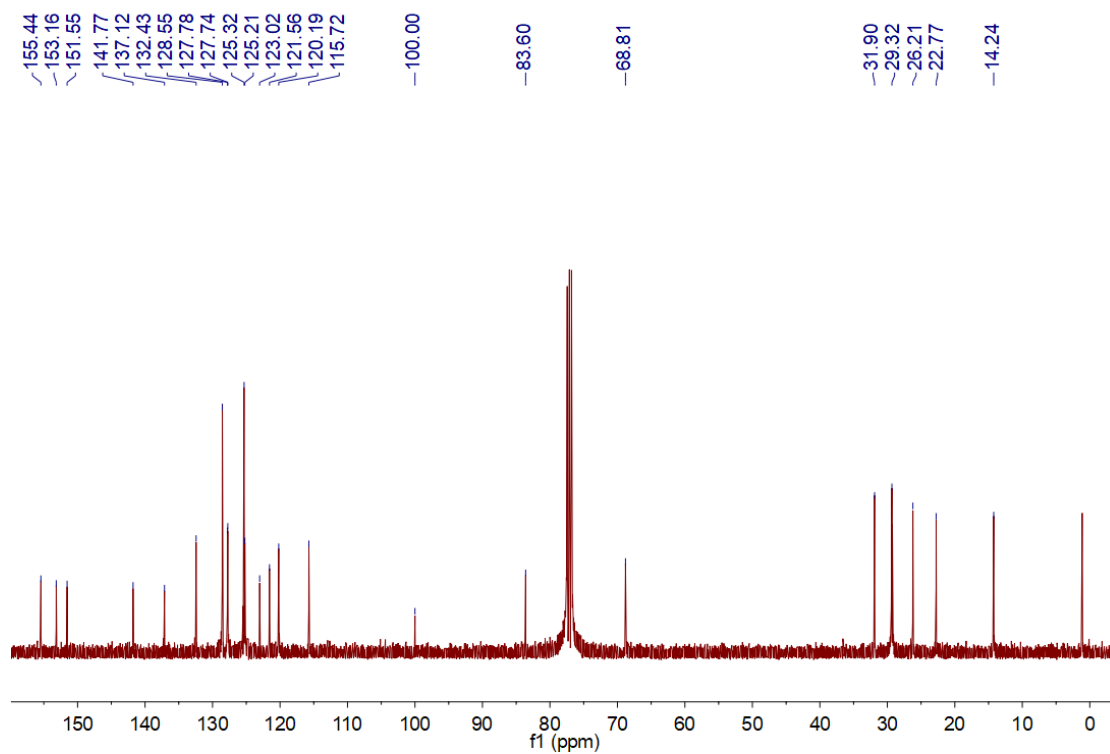

282

283 Supplementary Fig. 9.  $^{13}\text{C}$  NMR spectrum of **5** in  $\text{CDCl}_3$ .

284

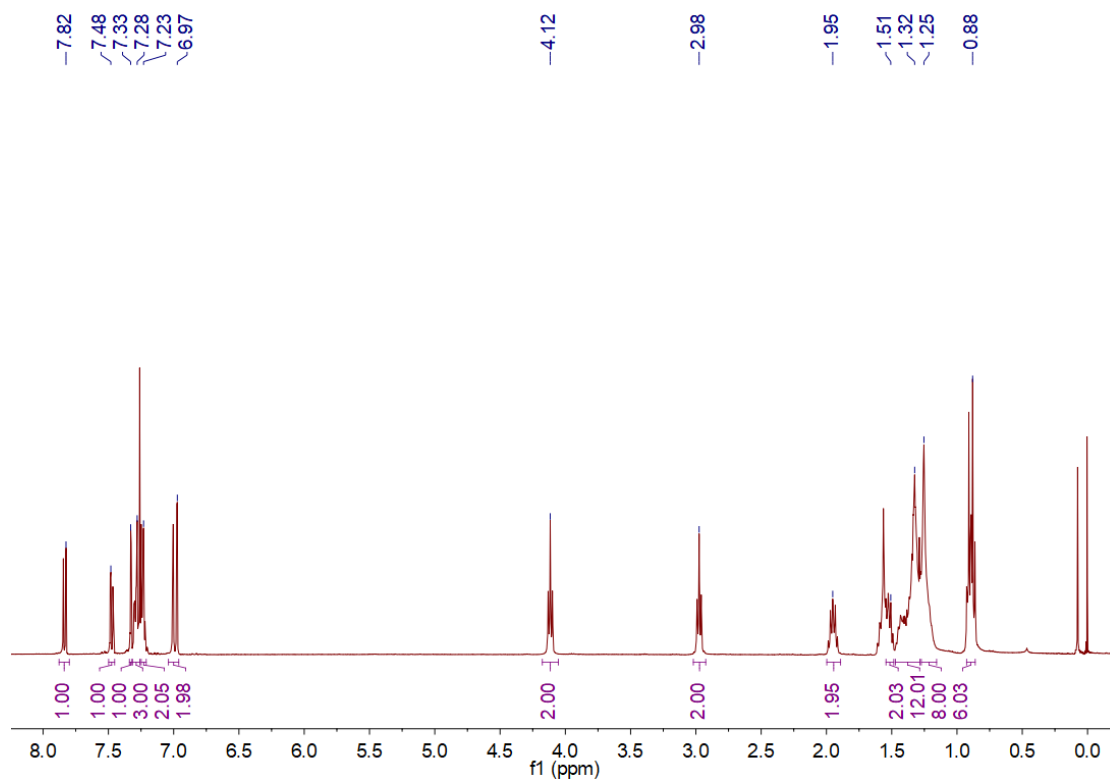

285

286 Supplementary Fig. 10.  $^1\text{H}$  NMR spectrum of **6** in  $\text{CDCl}_3$ .

287



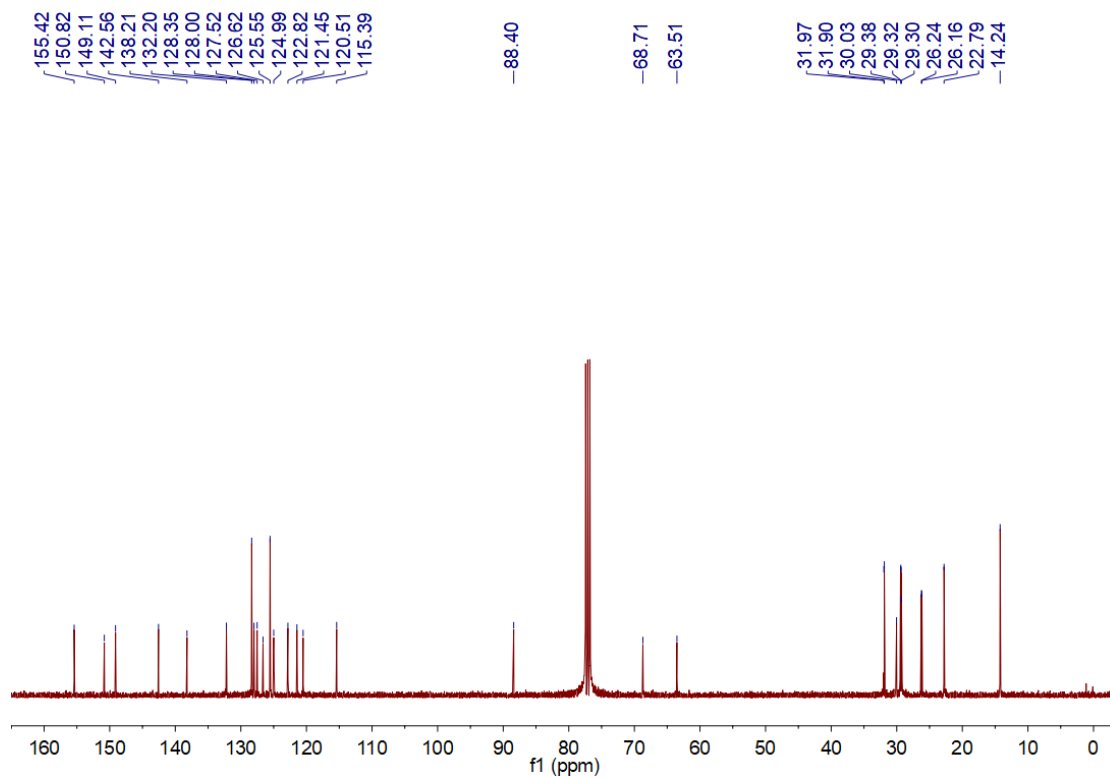

288

289 Supplementary Fig. 11.  $^{13}\text{C}$  NMR spectrum of **6** in  $\text{CDCl}_3$ .

290

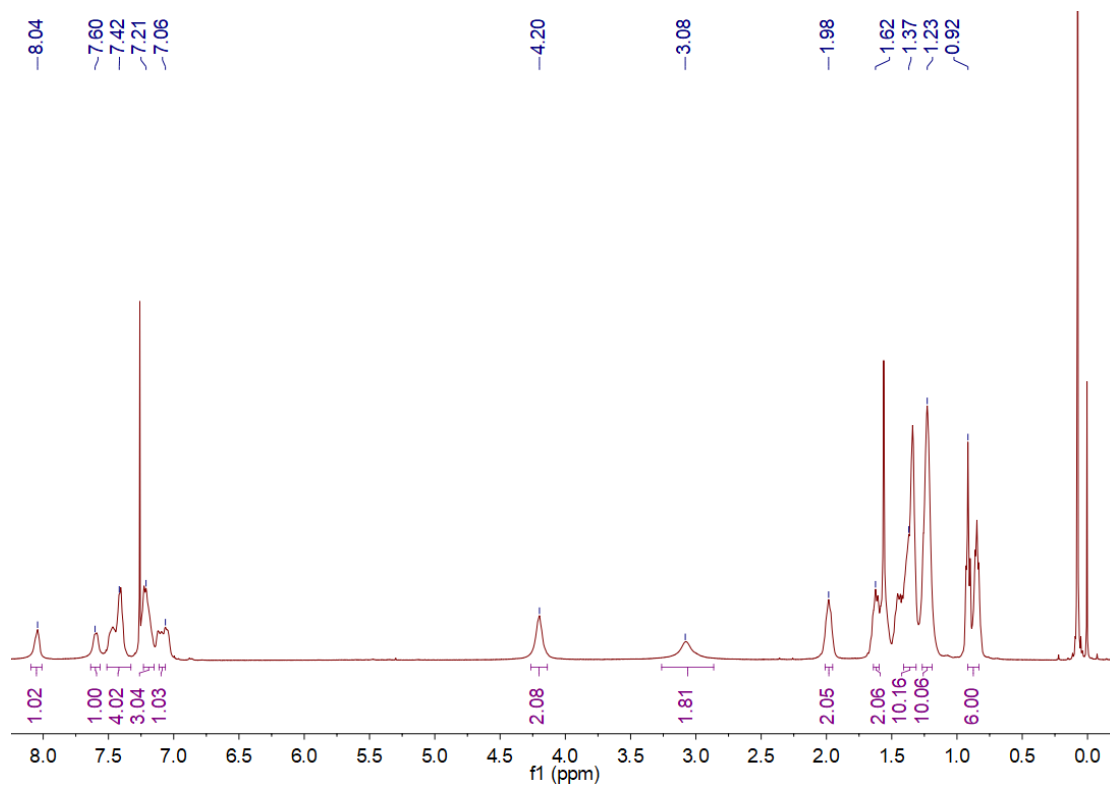

291

292 Supplementary Fig. 12.  $^1\text{H}$  NMR spectrum of POPOF in  $\text{CDCl}_3$ .

293

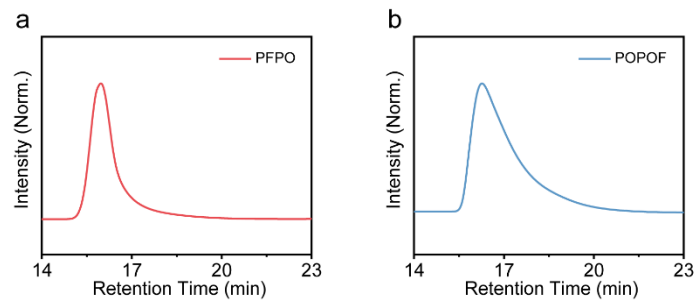

294

295 Supplementary Fig. 13. GPC curves of PFPO (a) and POPOF (b) using THF as the eluent.

296

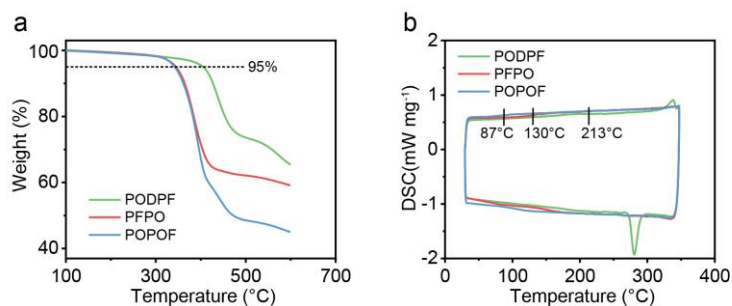

297

298 Supplementary Fig. 14. (a) TG and (b) DSC curves of three polymers.

299

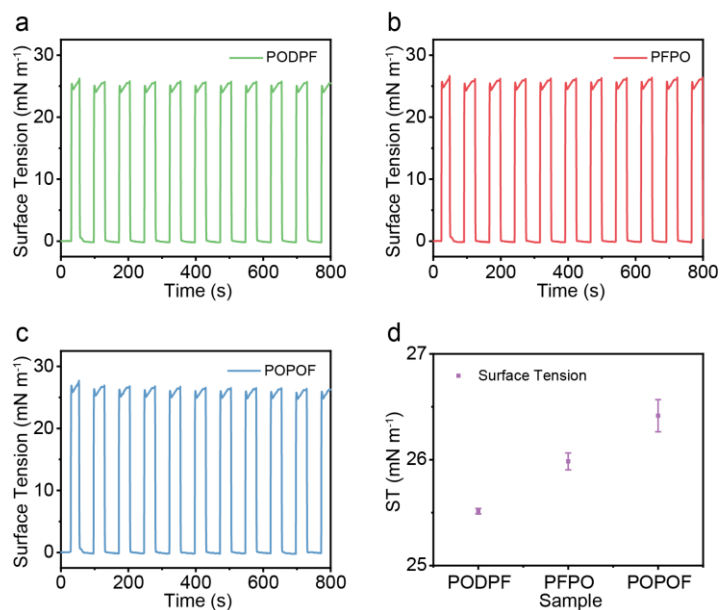

300

301 Supplementary Fig. 15. (a-c) Surface tension cyclic curves of three polymers measured by plate

302 method in toluene solution at a concentration of  $5 \text{ mg mL}^{-1}$ . (d) Error analysis of surface tension.

303

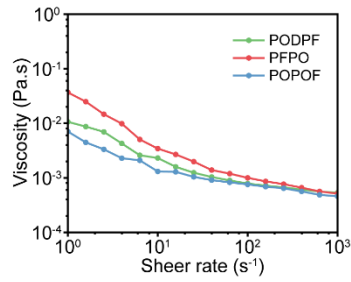

304

305 Supplementary Fig. 16. Viscosity curves of three polymers in toluene solution with a  
 306 concentration of 5 mg/mL.

307

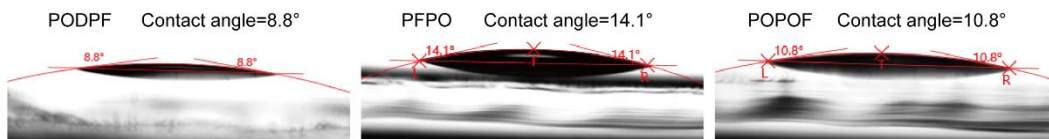

308

309 Supplementary Fig. 17. Contact angle measurement of three polymer ink (toluene solution with  
 310 the polymer concentration of 5 mg mL<sup>-1</sup>) on the surface of the PEDOT: PSS film.

311

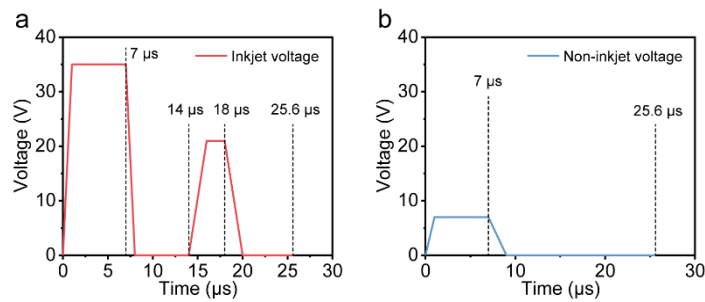

312

313 Supplementary Fig. 18. Pulse voltage waveform of inkjet printing. (a) Pulse voltage curve of ink  
 314 droplet extrusion process. (b) Pulse voltage curve of ink droplet suspension stability process.

315

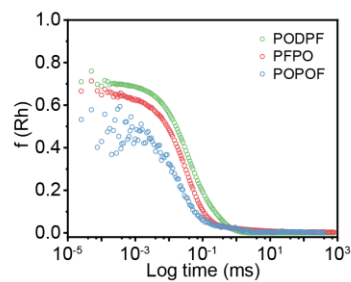

316

317 Supplementary Fig. 19. Normalized intensity correlation function ( $g^2_{(t)}^{-1}$ ).

318

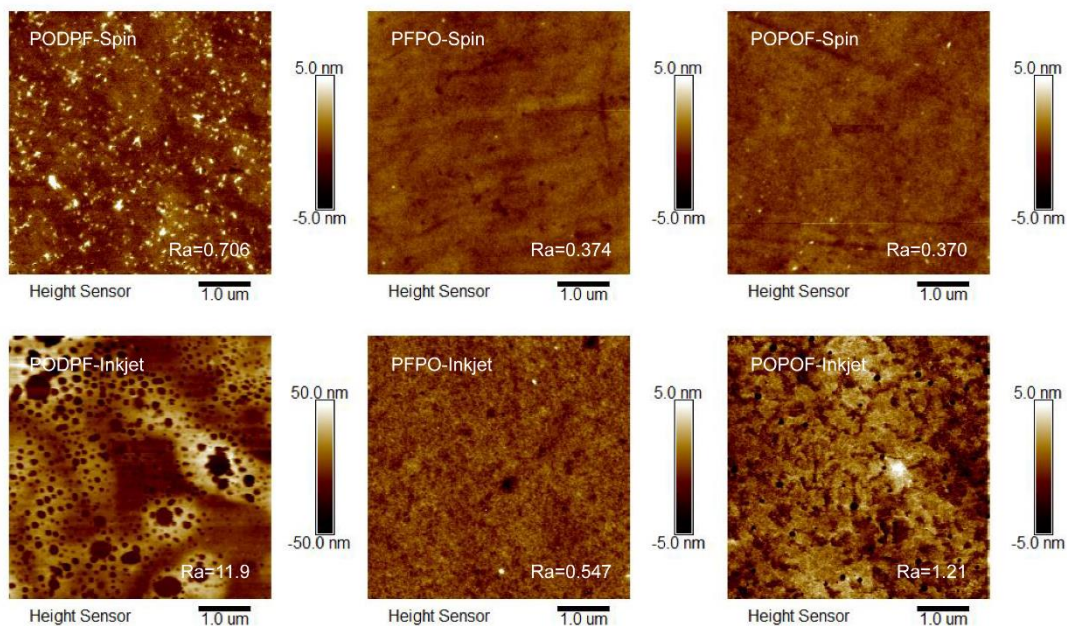

319

320 Supplementary Fig. 20. Atomic force microscopy images of spin-coated and inkjet films for three  
 321 polymers.

322

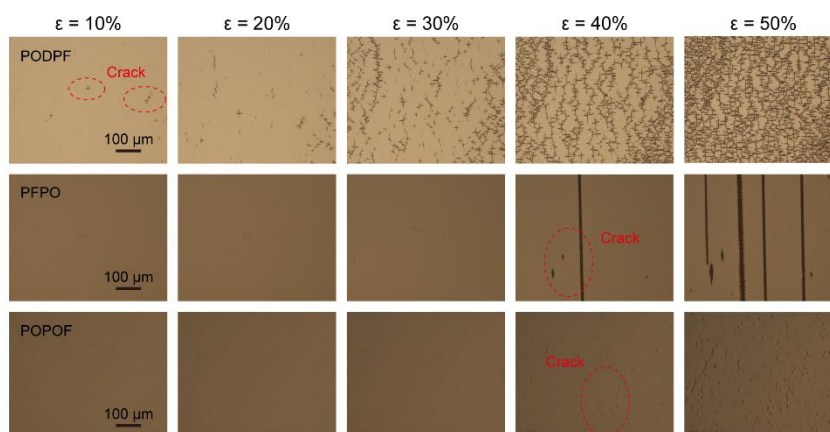

323

324 Supplementary Fig. 21. Optical photographs of three films stretched on PDMS substrates.

325

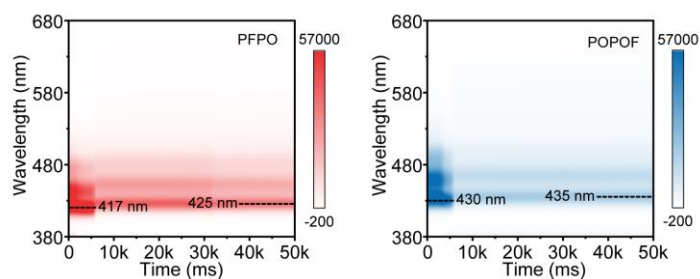

326

327 Supplementary Fig. 22. In situ coating-time dependent PL spectra of PFPO and POPOF in  
 328 solution processing.

329

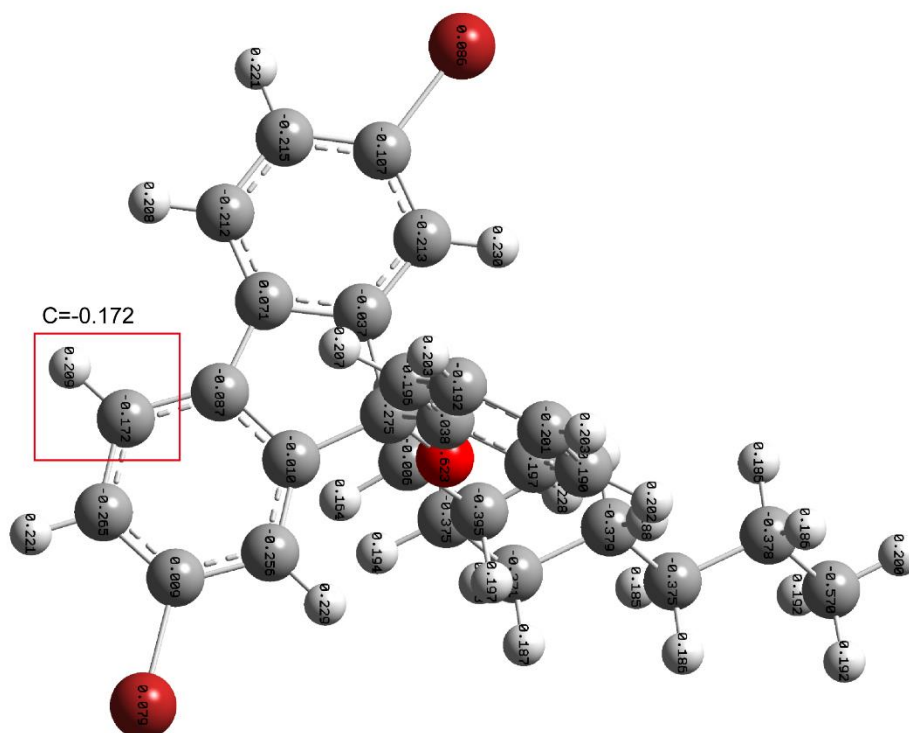

|   |          |          |          |   |          |          |          |    |          |          |          |
|---|----------|----------|----------|---|----------|----------|----------|----|----------|----------|----------|
| C | -1.05072 | 3.68509  | -1.98873 | C | -0.58721 | 0.10213  | 3.12096  | H  | 4.87372  | -2.98757 | -2.0516  |
| C | -1.84334 | 2.55387  | -2.19885 | C | -2.58002 | 1.14501  | 2.24838  | H  | 4.21231  | -3.51583 | -0.51293 |
| C | -1.72875 | 1.47211  | -1.32511 | C | -1.03622 | 0.3481   | 4.42169  | C  | 5.52396  | -1.79959 | -0.37463 |
| C | -0.63402 | 1.53172  | -0.24169 | H | 0.35907  | -0.39706 | 2.95386  | H  | 5.73379  | -0.88555 | -0.95062 |
| C | -0.04068 | 2.6479   | -0.02161 | C | -3.02544 | 1.38905  | 3.54513  | H  | 5.1415   | -1.46432 | 0.59932  |
| C | -0.16175 | 3.7183   | -0.91215 | H | -3.18884 | 1.45951  | 1.40493  | C  | 6.83169  | -2.57208 | -0.1571  |
| H | -1.12018 | 4.53726  | -2.65585 | C | -2.25344 | 0.99061  | 4.63967  | H  | 6.62145  | -3.48977 | 0.41256  |
| H | -2.53314 | 2.52916  | -3.03818 | H | -0.42689 | 0.03359  | 5.26515  | H  | 7.22454  | -2.9036  | -1.13003 |
| H | 0.64929  | 2.69474  | 0.8142   | H | -3.97663 | 1.89111  | 3.70104  | C  | 7.90981  | -1.76093 | 0.5731   |
| C | -0.88291 | 0.23671  | 0.58578  | H | -2.60024 | 1.18073  | 5.65187  | H  | 7.51798  | -1.4316  | 1.54604  |
| C | -1.91757 | -0.57485 | -0.21147 | C | 1.0352   | -0.76475 | -0.5356  | H  | 8.11955  | -0.84366 | 0.00457  |
| C | -2.40235 | 0.16304  | -1.30619 | H | 0.40158  | -1.44279 | -1.12467 | O  | 0.38092  | -0.41163 | 0.68468  |
| C | -2.36179 | -1.86378 | 0.04345  | H | 1.2188   | 0.13343  | -1.14218 | C  | 9.21243  | -2.53924 | 0.78469  |
| C | -3.35953 | -0.3922  | -2.15601 | C | 2.35096  | -1.44218 | -0.17308 | H  | 9.9609   | -1.9333  | 1.30805  |
| C | -3.31364 | -2.40756 | -0.82358 | H | 2.93239  | -0.75448 | 0.45258  | H  | 9.04114  | -3.44447 | 1.38031  |
| H | -1.98891 | -2.4332  | 0.88818  | H | 2.13429  | -2.32464 | 0.44395  | H  | 9.64742  | -2.85198 | -0.17267 |
| C | -3.81643 | -1.68957 | -1.91082 | C | 3.15328  | -1.85681 | -1.41484 | Br | 0.91797  | 5.27578  | -0.6494  |
| H | -3.75063 | 0.16421  | -3.00359 | H | 3.39259  | -0.96375 | -2.01091 | Br | -3.94968 | -4.18503 | -0.51266 |
| H | -4.5581  | -2.14342 | -2.5589  | H | 2.5193   | -2.48811 | -2.05352 |    |          |          |          |
| C | -1.35603 | 0.49899  | 2.02288  | C | 4.45191  | -2.62039 | -1.10537 |    |          |          |          |

330

331

332

Supplementary Fig. 23. Natural population analysis of atomic charge for PFPO.

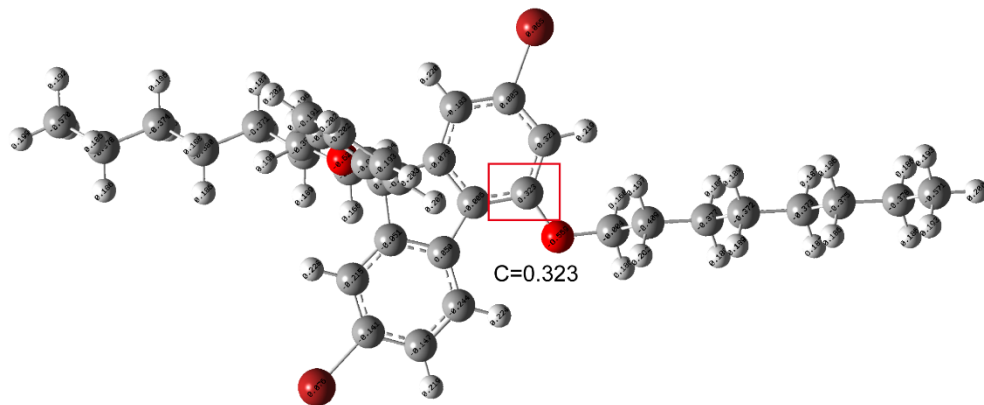

|   |          |          |          |   |           |          |          |    |           |          |          |
|---|----------|----------|----------|---|-----------|----------|----------|----|-----------|----------|----------|
| C | -0.62036 | -3.69881 | -1.29733 | H | 0.49499   | -2.10076 | 5.03659  | H  | -11.06217 | 3.18129  | -2.8139  |
| C | 0.2555   | -2.61101 | -1.23462 | H | -1.35942  | -1.2998  | 6.49426  | H  | -2.98272  | -5.18983 | -0.65902 |
| C | -0.06969 | -1.5252  | -0.41833 | C | -2.83355  | 0.84995  | -0.46932 | Br | 2.03138   | 4.01669  | 1.15326  |
| C | -1.25837 | -1.54379 | 0.33595  | C | -2.02934  | 1.51796  | -0.80889 | O  | 2.50258   | -0.52099 | -1.54744 |
| C | -2.13441 | -2.61662 | 0.28149  | H | -2.83823  | -0.03035 | -1.12747 | C  | 3.74968   | -0.08133 | -2.10413 |
| C | -1.79772 | -3.68982 | -0.54846 | C | -4.17934  | 1.56252  | -0.5215  | H  | 3.67569   | 0.97025  | -2.40957 |
| H | -0.39007 | -4.55154 | -1.92681 | H | -4.9463   | 0.88012  | -0.13605 | H  | 3.8618    | -0.67897 | -3.0138  |
| H | 1.17059  | -2.61126 | -1.81485 | H | -4.14933  | 2.42255  | 0.16112  | C  | 4.93251   | -0.31847 | -1.1663  |
| H | -3.04949 | -2.62837 | 0.86406  | C | -4.53387  | 2.03312  | -1.93933 | H  | 4.78761   | 0.24236  | -0.2344  |
| C | -1.40592 | -0.25863 | 1.16319  | H | -4.58661  | 1.16358  | -2.61108 | H  | 4.94596   | -1.38126 | -0.89215 |
| C | -0.14081 | 0.50814  | 0.74059  | H | -3.71671  | 2.66233  | -2.31978 | C  | 6.26905   | 0.07716  | -1.80923 |
| C | 0.61872  | -0.25014 | -0.16183 | C | -5.84852  | 2.82547  | -2.03518 | H  | 6.24311   | 1.14149  | -2.08622 |
| C | 0.24414  | 1.77715  | 1.15213  | H | -5.93677  | 3.23211  | -3.05257 | H  | 6.40218   | -0.47873 | -2.74914 |
| C | 1.82294  | 0.26751  | -0.66919 | H | -5.7959   | 3.69599  | -1.36459 | C  | 7.4756    | -0.17755 | -0.89596 |
| C | 1.43724  | 2.27268  | 0.62994  | C | -7.11365  | 2.01555  | -1.71807 | H  | 7.34201   | 0.3776   | 0.04396  |
| H | -0.34915 | 2.35477  | 1.85148  | H | -7.1435   | 1.12517  | -2.36424 | H  | 7.50157   | -1.2417  | -0.61939 |
| C | 2.2302   | 1.54661  | -0.26141 | H | -7.07122  | 1.64104  | -0.68601 | C  | 8.81515   | 0.21507  | -1.53217 |
| H | 3.15087  | 1.98601  | -0.62065 | C | -8.4075   | 2.8191   | -1.9037  | H  | 8.78783   | 1.27965  | -1.80838 |
| C | -1.40669 | -0.54848 | 2.67102  | H | -8.37574  | 3.71288  | -1.26257 | H  | 8.94646   | -0.33923 | -2.47343 |
| C | -2.4449  | -0.1009  | 3.49325  | H | -8.45965  | 3.19085  | -2.9381  | C  | 10.02265  | -0.04085 | -0.62127 |
| C | -0.34982 | -1.27054 | 3.24367  | C | -9.67796  | 2.01835  | -1.59022 | H  | 9.89199   | 0.51331  | 0.3202   |
| C | -2.42531 | -0.37213 | 4.86444  | H | -9.62691  | 1.64891  | -0.55606 | H  | 10.05037  | -1.10541 | -0.34455 |
| H | -3.26444 | 0.45655  | 3.05712  | H | -9.70951  | 1.12491  | -2.23002 | C  | 11.36331  | 0.35091  | -1.25592 |
| C | -0.332   | -1.53915 | 4.61004  | O | -2.60723  | 0.45347  | 0.88446  | H  | 11.33596  | 1.41481  | -1.53144 |
| H | 0.46359  | -1.62565 | 2.61665  | C | -10.965   | 2.82761  | -1.77995 | H  | 11.49382  | -0.20284 | -2.19664 |
| C | -1.37224 | -1.09004 | 5.42799  | H | -11.8531  | 2.22845  | -1.54844 | C  | 12.56389  | 0.09152  | -0.34018 |
| H | -3.24051 | -0.01805 | 5.49039  | H | -10.97875 | 3.70935  | -1.12731 | H  | 13.50477  | 0.38151  | -0.82161 |
|   |          |          |          |   |           |          |          | H  | 12.4794   | 0.65916  | 0.59473  |
|   |          |          |          |   |           |          |          | H  | 12.63866  | -0.9705  | -0.07562 |

333

334 Supplementary Fig. 24. Natural population analysis of atomic charge for POPOF.

335

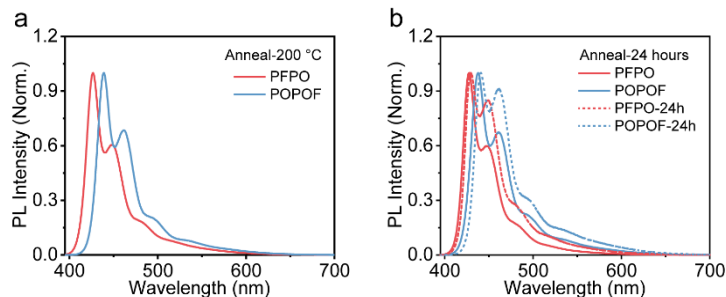

336

337 Supplementary Fig. 25. (a) PL spectra of annealed films for PFPO and POPOF. (b) PL spectra of  
338 two films kept in the air after 24 hours.

339

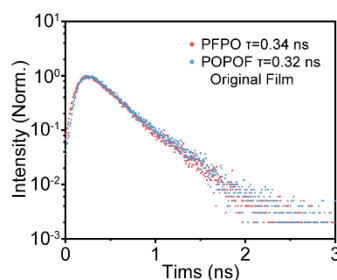

340

341 Supplementary Fig. 26. Decay time spectra of spin-coated films for PFPO and POPOF.

342

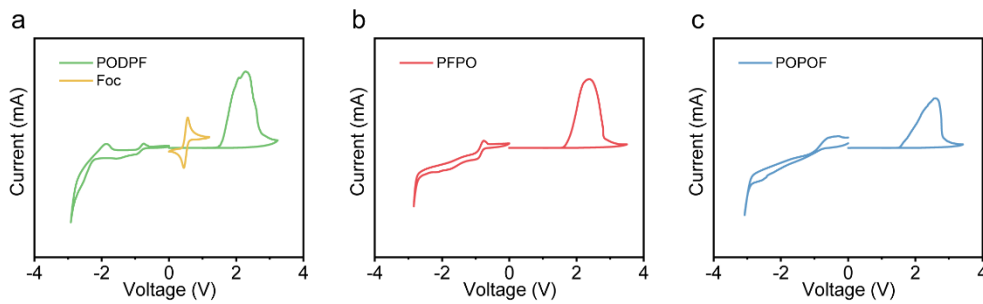

343

344 Supplementary Fig. 27. Cyclic voltammetry curves for three polymer films. Cyclic voltammetry  
345 curves of PODPF (a), PFPO (b) and POPOF (c) films.

346

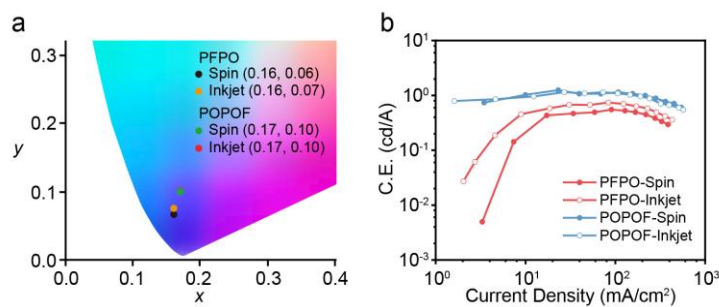

347

348 Supplementary Fig. 28. (a) CIE and (b) Current efficiency versus current density curves of  
349 spin-coated and inkjet PLEDs for PFPO and POPOF.

350

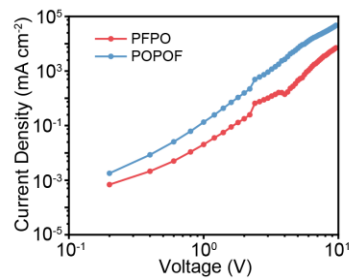

351

352 Supplementary Fig. 29. Double logarithmic plots of current density vs. applied voltage for the  
353 hole transport devices.

354

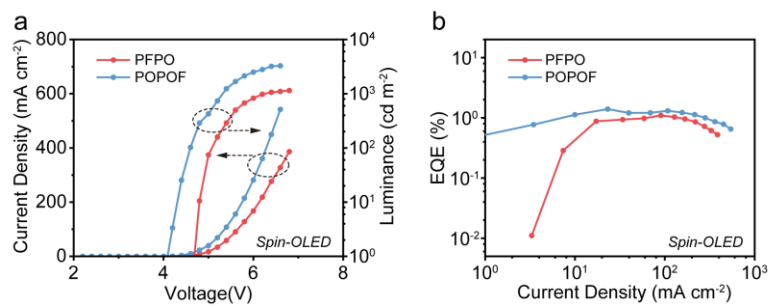

355

356 Supplementary Fig. 30. (a)  $J$ - $L$ - $V$  characteristics and (b) EQE of spin-coated PLEDs based on  
357 PFPO and POPOF.

358

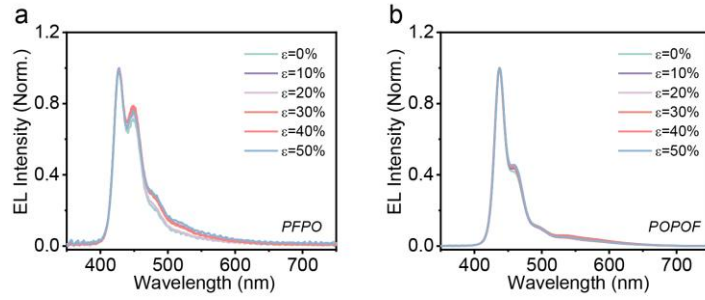

359

360 Supplementary Fig. 31. EL spectra of (a) PFPO and (b) POPOF films under different stretching  
 361 degrees.

362

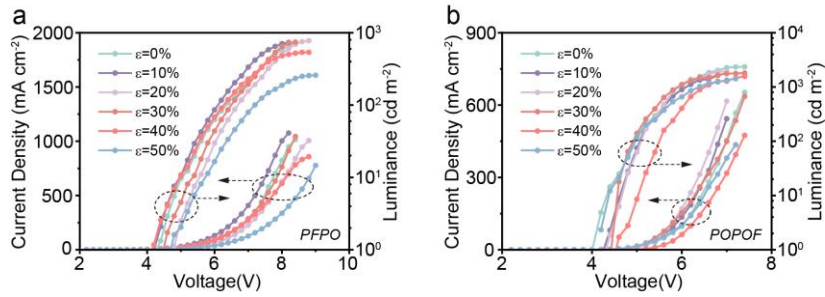

363

364 Supplementary Fig. 32. Corresponding current  $J$ - $V$ - $L$  curves of (a) PFPO and (b) POPOF films  
 365 under different stretching degrees.

366

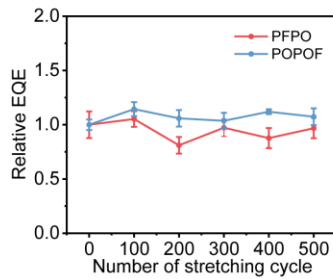

367

368 Supplementary Fig. 33. Relative highest EQE statistics of PLEDs using PFPO and POPOF films  
 369 with cyclic strain.

370

371

372

373

374

375

376

377

378



379 Supplementary Table 1. The fundamental chem-physical properties of three polymers.

|       | $M_n$ | PDI | $T_d$ [°C] | $T_g$ [°C] | HOMO <sup>a)</sup> | LUMO <sup>a)</sup> | $E_g$ <sup>b)</sup> |
|-------|-------|-----|------------|------------|--------------------|--------------------|---------------------|
| PODPF | 60k   | 1.8 | 405        | 213        | 5.97               | 2.32               | 3.65                |
| PFPO  | 75k   | 1.7 | 342        | 130        | 6.15               | 2.33               | 3.82                |
| POPOF | 36k   | 1.9 | 342        | 87         | 5.97               | 2.40               | 3.57                |

380 <sup>a)</sup> Determined by cyclic voltammetry in acetonitrile. <sup>b)</sup> Calculated from  $E_g$  = lowest unoccupied  
381 molecular orbital-highest occupied molecular orbital (LUMO-HOMO), LUMO, and HOMO  
382 levels were measured by cyclic voltammetry.

383

384 Supplementary Table 2. The fundamental photophysical properties of PFPO and POPOF.

|       | Sol. <sup>a)</sup> : UV/PL | Film: UV/PL     | $\Phi_{\text{film}}$ <sup>b)</sup> | $\tau_{\text{film}}$ [ps] <sup>c)</sup> | $k_r^{\text{film}}$ [ns <sup>-1</sup> ] <sup>d)</sup> | $k_{\text{nr}}^{\text{film}}$ [ns <sup>-1</sup> ] <sup>e)</sup> |
|-------|----------------------------|-----------------|------------------------------------|-----------------------------------------|-------------------------------------------------------|-----------------------------------------------------------------|
| PFPO  | 395/417,442,474            | 390/425,452,483 | 35.19                              | 0.34                                    | 1.04                                                  | 1.90                                                            |
| POPOF | 403/430,458,492            | 396/435,463,495 | 39.21                              | 0.32                                    | 1.23                                                  | 1.90                                                            |

385 <sup>a)</sup> Measured in the toluene solution with a concentration of  $10^{-5}$  mol L<sup>-1</sup>; <sup>b)</sup> Absolute  
386 photoluminescence quantum yield. <sup>c)</sup> Lifetime calculated from fluorescence decay. <sup>d)</sup> calculated  
387 from  $k_r = \Phi/\tau$ , <sup>e)</sup> calculated from  $k_{\text{nr}} = 1/\tau - k_r$ .

388

389 **Supplementary References**

- 390 1. An X., *et al.* Universal 4-qualifiable fluorene-based building blocks for potential  
391 optoelectronic applications. *Chin. Chem. Lett.* **33**, 5137-5141 (2022).
- 392 2. Lin J.-Y., *et al.* A Rational Molecular Design of  $\beta$ -Phase Polydiarylfluorenes: Synthesis,  
393 Morphology, and Organic Lasers. *Macromolecules.* **47**, 1001-1007 (2014).

394
